# Supplementary material for: Influence of Long-Term Outdoor Storage of Rockrose (Cistus laurifolius L.) Shrub Biomass on Biofuels Quality, Pre-Treatment and Combustion Processes
Source: Preprints.org preprint supplement (doi:10.20944/preprints202309.1468.v1), 2023-09-21
Supplement: Supplementary file 1 [file supplementary]

**Supplementary Materials:**


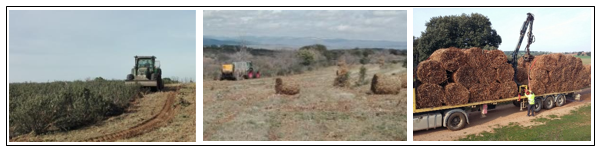


(a) (b) (c)

Figure S1: (a) Biomass collection with a harvester-baler in Soria, Spain; (b) Rockrose bales; (c) Logging truck loading bales


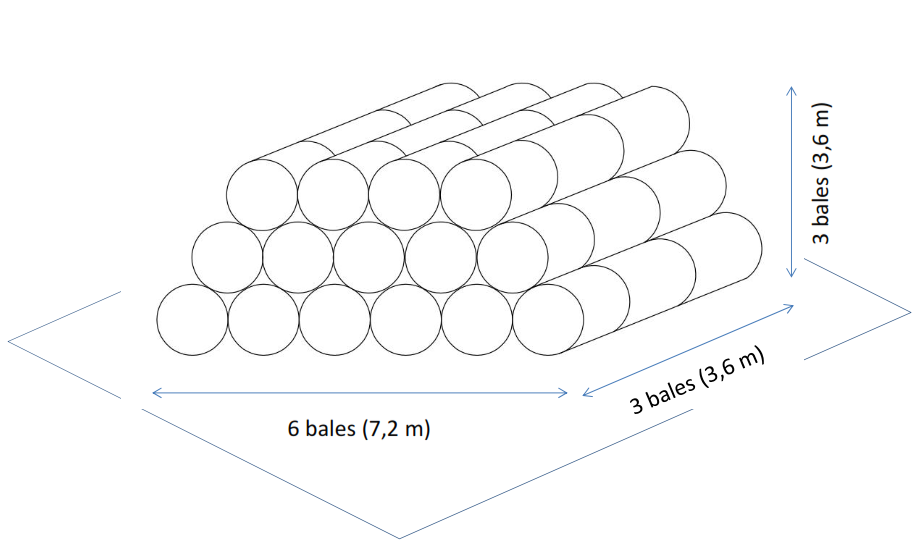


Figure S2: Stored rockrose bales for biomass dry matter variation study at CEDER-CIEMAT


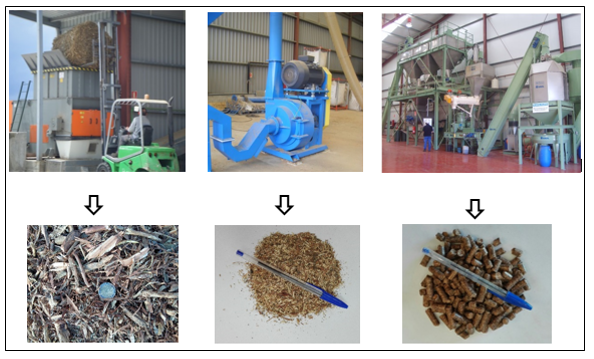


Figure S3: Pre-shredder (90 kW) and 30 mm milled rockrose (left); Post-grinder (75 kW) and 4 mm milled rockrose (center); Pelletisation pilot plant (30 kW) and Ø 8 mm rockrose pellets (right). Installations located at CEDER-CIEMAT (Soria)


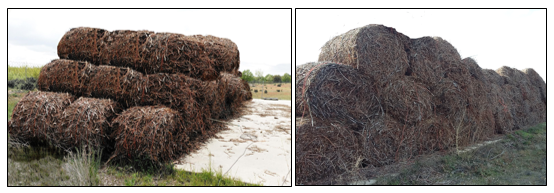


| (**a**) | (**b**) |
| --- | --- |
|  |  |

Figure S4: (a) Rockrose bale pile B at the time of stacking; (**b)** Rockrose bale pile B after the storage period (right)


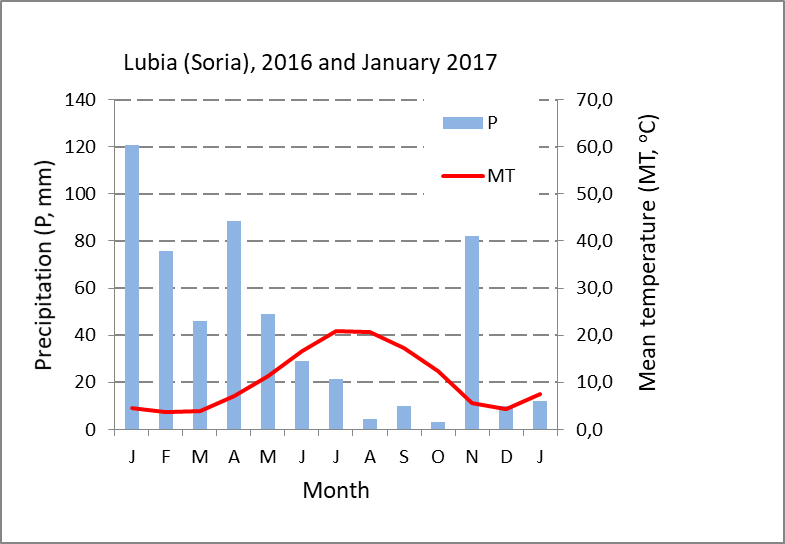


Figure S5. Bioclimatic diagram of CEDER (Lubia) during the storage period. Source: Lubia Weather Station data (Soria)
